# 1 **Reconstructing the ecology of a Jurassic pseudoplanktonic megaraft** 2 **colony**

3  
4 **Short title:** A Jurassic megaraft ecosystem

5  
6 Aaron W. Hunter<sup>a,b\*</sup>, David Casenove<sup>c</sup>, Emily Mitchell<sup>a</sup>, and Celia Mayers<sup>d</sup>

7  
8 <sup>a</sup>Department of Earth Sciences, University of Cambridge, Downing Street, Cambridge, CB2 3EQ, UK.

9 <sup>b</sup>School of Earth Sciences, University of Western Australia, 35 Stirling Highway, Crawley, WA 6009, Australia.

10 <sup>c</sup>ALESS Program Center for Global Communication Strategies, Komaba International Building for Education and Research  
11 (KIBER), Komaba Campus, The University of Tokyo, Meguro-ku, Tokyo, 153-8902, Japan

12 <sup>d</sup>Department of Applied Geology, Curtin University, Perth, Western Australia

13 \*To whom correspondence should be addressed. Email: [awh31@cam.ac.uk](mailto:awh31@cam.ac.uk) (A.W.H.)

14  
15 **Keywords:** Transoceanic rafting | Holzmaden Lagerstätte | Spatial Analysis | Diffusion analyses |  
16 Crinoidea

17  
18 **Author contributions:** A.W.H., D.C. and E.M. contributed equally to research, discussion, and  
19 manuscript preparation. A.W.H designed the research project, collected the museum data, photographed  
20 fossil material and prepared the specimen figures including the spatial analysis plots. D.C. designed and  
21 ran the diffusion analyses, and prepared the corresponding diagrams. E.M. designed and ran the spatial  
22 analysis, and prepared the corresponding diagrams. CM prepared the reconstruction.

23 The authors declare no conflict of interest.

24

## 1 **Abstract**

2 Pseudoplanktonic crinoid megaraft colonies are an enigma of the Jurassic. They are among the largest in-situ  
3 invertebrate accumulations ever to exist in the Phanerozoic fossil record. These megaraft colonies and are  
4 thought to have developed as floating filter-feeding communities due to an exceptionally rich relatively predator  
5 free oceanic niche, high in the water column enabling them to reach high densities on these log rafts. However,  
6 this pseudoplanktonic hypothesis has never actually been quantitatively tested and some researchers have cast  
7 doubt that this mode of life was even possible. The ecological structure of the crinoid colony is resolved using  
8 spatial point process techniques and its longevity using moisture diffusion models. Using spatial analysis we  
9 found that the crinoids would have trailed preferentially positioned at the back of migrating structures in the  
10 regions of least resistance, consistent with a floating, not benthic ecology. Additionally, we found using a series  
11 of moisture diffusion models at different log densities and sizes that ecosystem collapse did not take place solely  
12 due to colonies becoming overladen as previously assumed. We have found that these crinoid colonies studied  
13 could have existed for greater than 10 years, even up to 20 years exceeding the life expectancy of modern  
14 documented megaraft systems with implications for the role of modern raft communities in the biotic  
15 colonisation of oceanic islands and intercontinental dispersal of marine and terrestrial species.

16

## 17 **Significance statement**

18 Transoceanic rafting is the principle mechanism for the biotic colonisation of oceanic island ecosystems.  
19 However, no historic records exist of how long such biotic systems lasted. Here, we use a deep-time example  
20 from the Early Jurassic to test the viability of these pseudoplanktonic systems, resolving for the first time whether  
21 these systems were truly free floating planktonic and viable for long enough to allow its inhabitants to grow to  
22 maturity. Using spatial methods we show that these colonies have a comparable structure to modern marine  
23 pseudoplankton on maritime structures, whilst the application of methods normally used in commercial logging is  
24 used to demonstrate the viability of the system which was capable of lasting up to 20 years.

## 1 **Introduction**

2 Transoceanic rafting is a fundamental feature of marine evolutionary biogeography and ecology, often  
3 invoked to explain the origins of modern global patterns of species distributions<sup>1,2,3,4</sup>. These  
4 communities have been recorded today lasting up to 6 years<sup>5</sup>. However, the deep time ecology of  
5 these communities has never been investigated in detail<sup>6</sup>. In recent communities, such rafts have  
6 included highly adapted bivalves, barnacle, limpets, bryozoans, sea anemones, amphipods, and  
7 isopods<sup>5</sup>. In the Jurassic these communities also consisted of specially adapted crinoids, whose apparent  
8 maturity suggests that these communities had to have lasted longer than modern examples (>6 years)<sup>6</sup>.  
9 The structure and duration and these colonies has remained a mystery, with most studies choosing to  
10 focus on how the crinoids were adapted rather than the viability of the system, prompting intense debate  
11 on their lifestyle<sup>7,8</sup> rather than the ecological structure and longevity of the habitat. This study uses the  
12 latest ecological techniques used in paleobiology to reconstruct the ecology and duration of these rafts.

13 Crinoids or sea lilies were a major part of the Jurassic shallow sea ecosystem, with crinoids found  
14 in a diverse suite of shallow marine environments<sup>9</sup>. The monospecific crinoid colonies preserved on  
15 wood rafts are one of the most enigmatic and iconic of these communities<sup>10</sup>. Found globally, they  
16 represent one of the largest *in-situ* invertebrate accumulations found in the fossil record<sup>6</sup>, the only fossil  
17 example of transoceanic rafting with up to 100 individuals covering oyster-encrusted logs up to 14m  
18 long<sup>11</sup>. An ongoing debate prevails on whether these crinoids could have colonized and persisted on  
19 these floating log habitats or they were instead part of benthic islands systems typical of the Mesozoic<sup>12</sup>.  
20 Previous studies have not quantitatively addressed this quandary. In the present study we use spatial  
21 statistics and diffusion modelling in a novel approach to test whether this pseudoplanktonic mode of life  
22 existed. Spatial statistics are used to test whether the logs were colonized in open water or on the  
23 substrate, and diffusion models then quantify floating-log mechanics to test how long a floating system  
24 could have existed.

1 The spatial positions of *Seirocrinus* on one of the largest and best-preserved Early Jurassic floating  
2 wood examples known, the giant ‘Hauff Specimen’ from Holzmaden, Germany<sup>13</sup> was mapped (Fig. 1).  
3 The spatial patterns of benthic organisms depend on the dispersal of larvae<sup>14</sup>, the environmental  
4 conditions in which they settled, and whether the conditions were favorable for them to grow to  
5 adulthood<sup>15</sup>. Therefore, the spatial patterns of the crinoids can be used to try to “reverse engineer” the  
6 conditions in which they settled in order to deduce the environmental conditions (what part of the water  
7 column the log was in) when colonized<sup>16, 17</sup>.

8

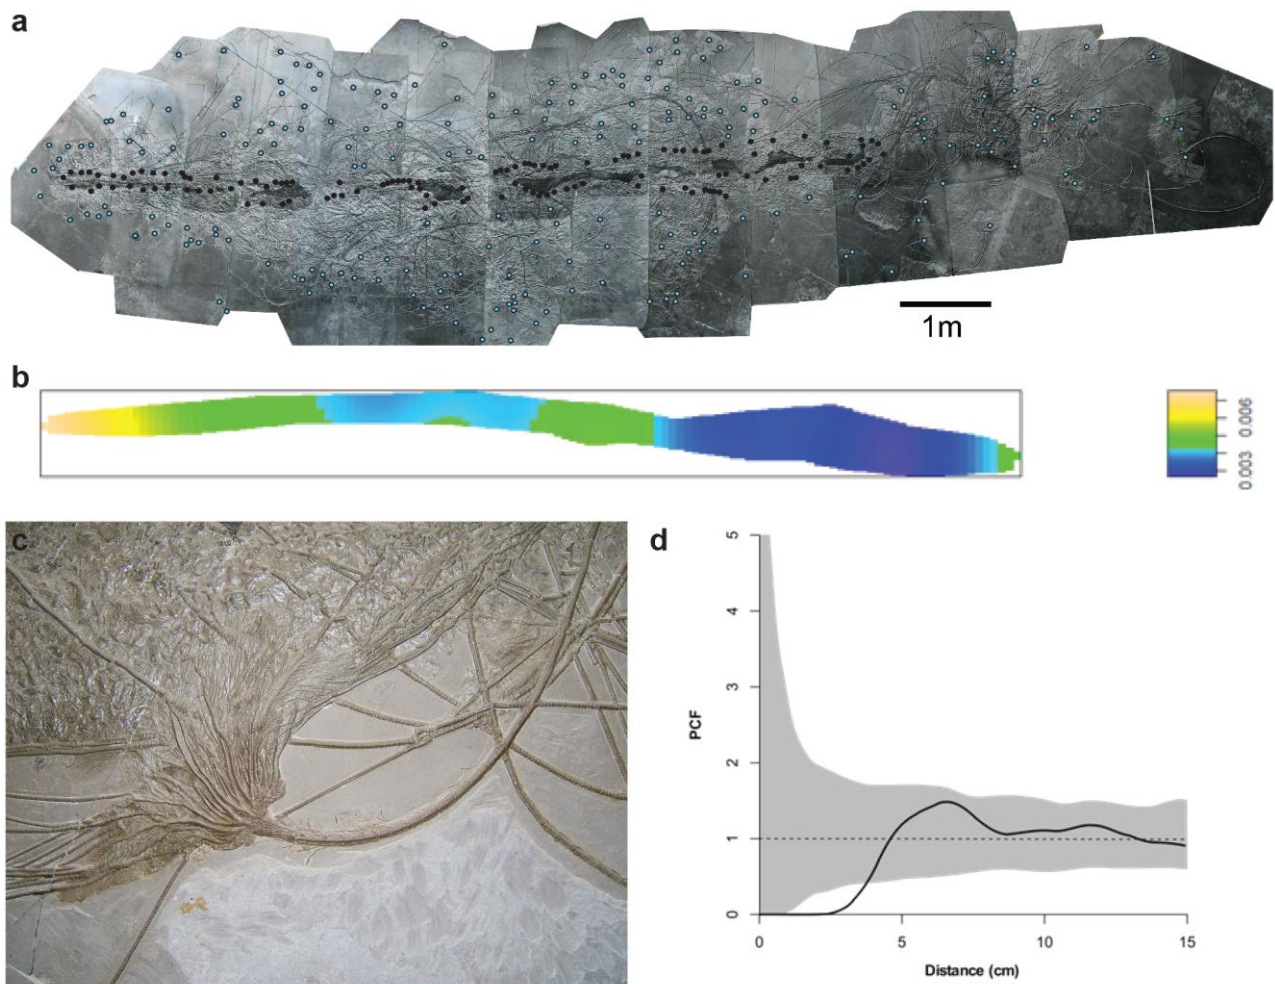

9 **Fig. 1.** Crinoid fossil megaraft, the ‘Hauff Specimen’ from Holzmaden (G1). (A) Log with spatial analysis data points; key:  
10 blue= crinoid crowns, black= attachment discs. (B) Spatial analysis plot. (C) Close up view of crinoid crown and stem  
11 sections. (D) PCF distance plot.  
12

13

14

15

1 This analysis was complemented by analyses using density/diffusion models<sup>18, 19</sup> to constrain the  
2 length of time logs of differing sizes and densities, with a full colony, could stay afloat as water  
3 infiltrates the wood over time. This diffusion analysis used three sets of size defined colonies (Fig. 2),  
4 including small colony specimens (S1 & S2) medium colonies (M1 & M2) and finally massive giant  
5 colonies from Holzmaden (G1 “The Hauff Specimen” & G2).

6

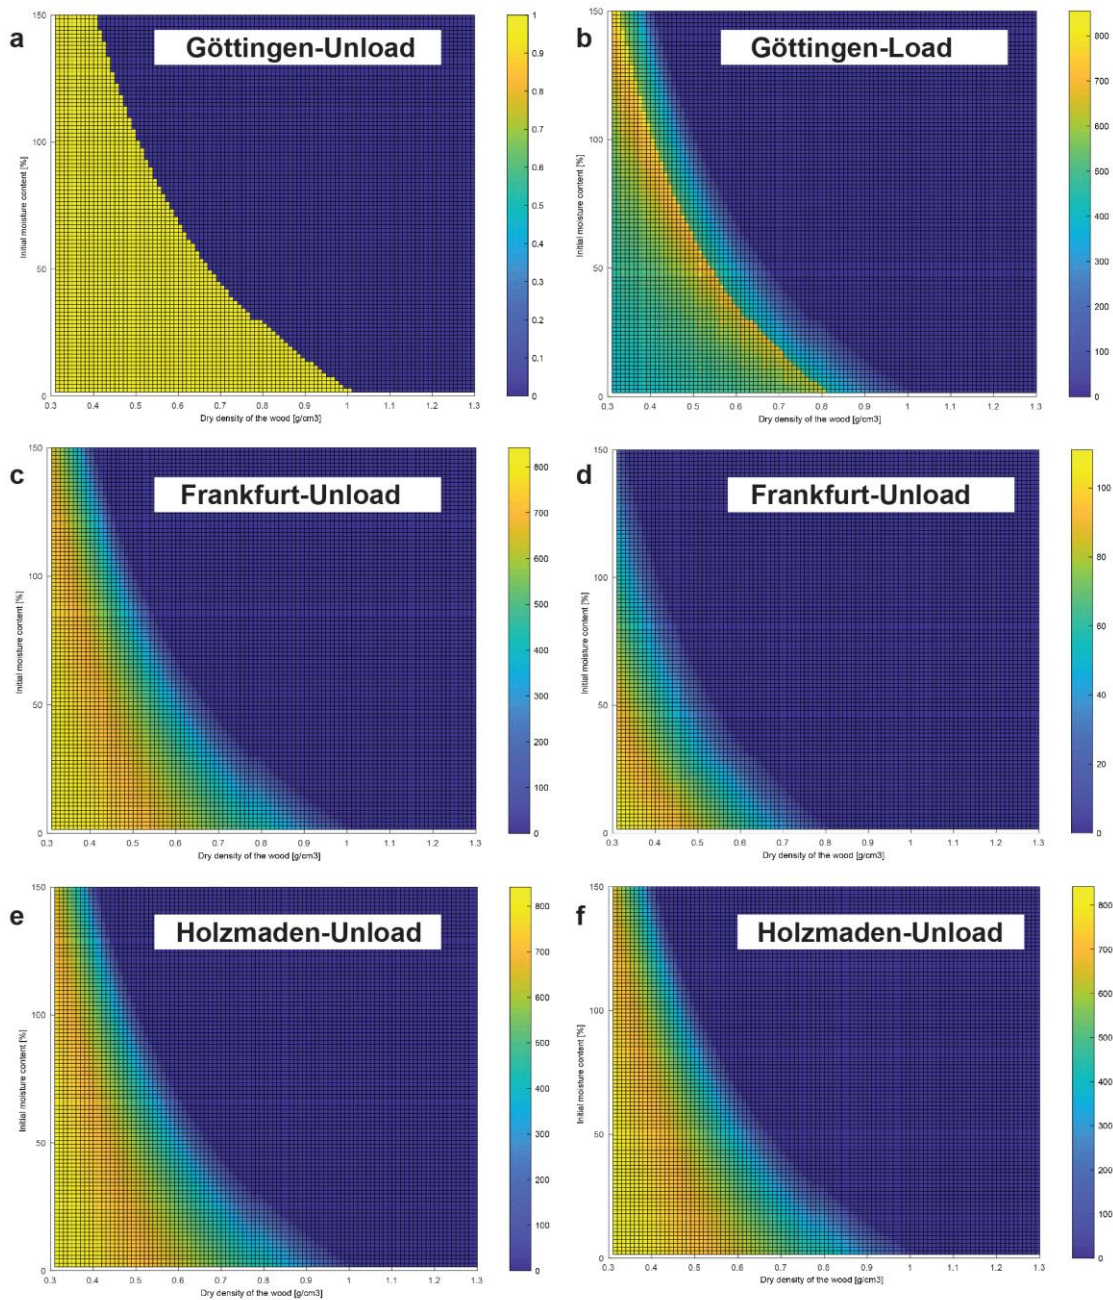

7

8

9

**Fig. 2.** Wood diffusion gradient plots. (A) S1 unloaded. (B) S1 loaded. (C) M1 unloaded. (D) M1 loaded. (E) G1 unloaded. (F) G1 loaded.

10

## 1 **Results**

2 The spatial analyses clearly show an ecological signal of directionality along the log with the highest  
3 density on the left hand side, with decreasing density along the log (Fig. 2). This directionality can be  
4 modelled by heterogeneous Poisson model depending on the  $x$  co-ordinate (SI Table 1). The diffusion  
5 analysis is represented by two models, which constantly show that the largest of the log systems could  
6 have survived for a minimum of 2 years and a maximum of 20 years. Thus allowing the crinoid colony  
7 to grow to maturity and confirming the viability of the pseudoplanktonic hypothesis. Firstly, the  
8 diffusion model assumes that the system is not adequately sealed. When the diffusion model is applied  
9 to the small logs (S1-S2) without the population, the log would sink after 800 days, however when the  
10 colony is added it would sink within 1 day (Fig. 2). The apparent longevity of the logs is increased by  
11 their size, with the medium sized logs (M1-M2) surviving 100 days (800 without the colony) and the  
12 massive colonies (G1-G2) surviving up to 400 days (800 days without the colony) (Fig. 2). Our results  
13 suggest that without any natural sealing the largest megarrafts could only have survived for just over two  
14 years with the smaller systems unviable despite being relatively common. We propose that in order for  
15 the system to survive for long enough for the animals to grow to maturity the natural sealing of the  
16 wood structure would be needed with the oysters and the crinoids being part of efficient sealing of the  
17 system. The population model incorporated both the spatial distribution along the log as well as  
18 life-history estimates (fecundity, mortality, settling rates and maturation time) for a complete life cycle  
19 of extant oyster *Ostrea chilensis*. Simulations for the growth of oyster communities including spawning  
20 rate, per capita reproductive rate and mortality rate correspond to average values taken from the  
21 literature about *Ostrea chilensis*. The model allowed reconstruction of the number of years required to  
22 reach sinking density for the whole log for various values of  $K$  (SI Table 2). In some cases, the  
23 dimensions of the log combined with the density of the wood material would allow the oyster and  
24 crinoid loaded log never to reach sinking threshold within the 20-year window.

1

## 2 Discussion

3 The crinoids attached preferentially to one end of the log structure (Fig. 1), with other parts of the log  
4 more sparsely populated and attachment discs barely developed on the upper surface (Fig. 3).

5

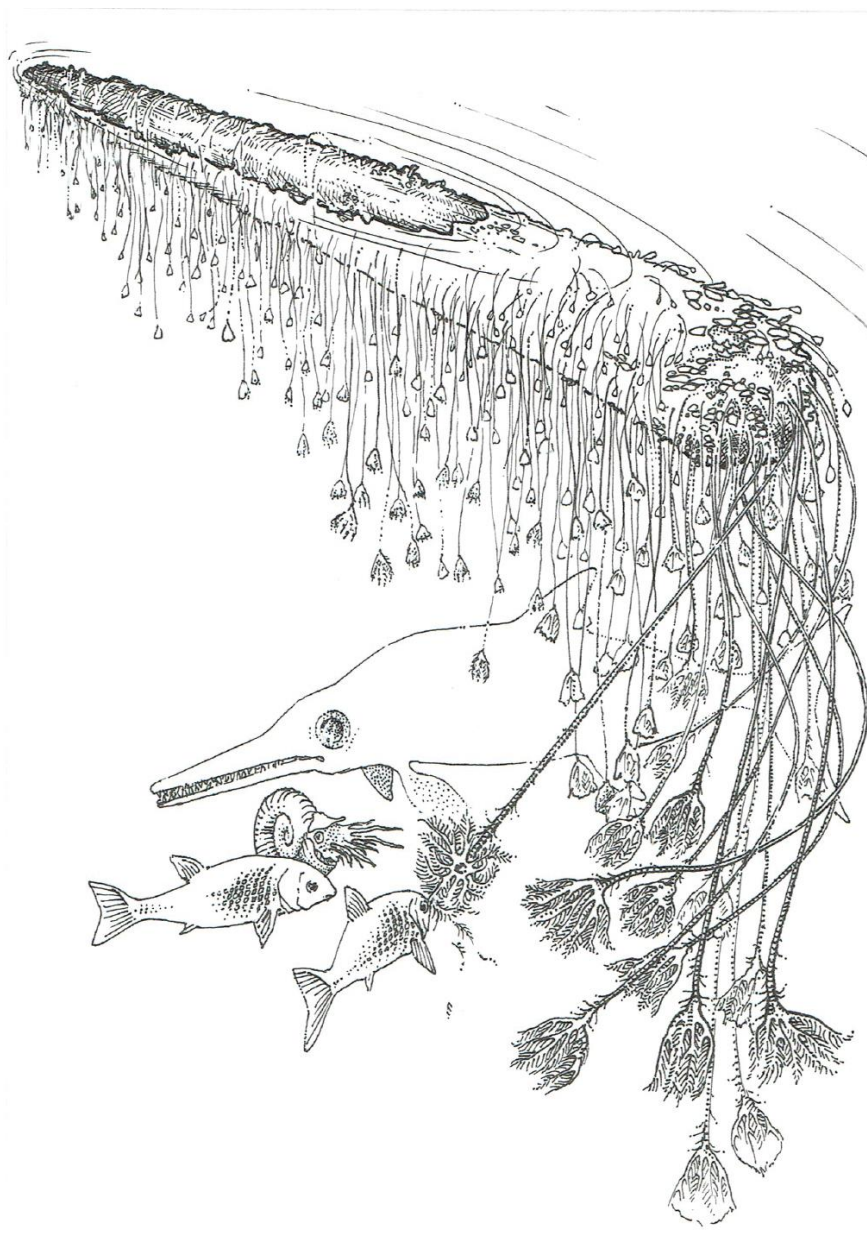

6

7

**Fig. 3.** Reconstruction of the Holzmaden ‘Hauff Specimen’ crinoid megaraft colony (G1).

8

9

10

1 These spatial analyses support the hypothesis that our largest colony was structured as a floating body  
2 not a benthic structure. This feature is demonstrated by modern shipworms, for example, which  
3 preferentially accumulate at one end of the structure<sup>20</sup>. In the case of a ship, this would be the back or  
4 stern. If the log were moving through the water even at a low rate the bow of the structure would still be  
5 subject to the most current pressure, so the most hospitable part of the structure would be the area of  
6 least resistance, the stern. However, this asymmetric distribution, combined with the observation that  
7 the vast majority of crinoids are attached to the underside of the log (Figs. 1 and 3), would make the log  
8 unbalanced towards one end, bringing the colony's stability into question. The conventional view is that  
9 the community would have rapidly sunk and been preserved at anoxic depths due to becoming unstable  
10 or overladen<sup>13</sup>. However, our diffusion model does not support rapid sinking for three key reasons.

11 Firstly, the growing community of oysters and crinoids even at the climax state would still be a  
12 minor component of the total weight of the system (SI Data). Secondly, without efficient sealing our  
13 catastrophic models suggest the log could have supported the population of crinoids for a substantial  
14 amount of time. Even with a system designed to be a catastrophic scenario taking on water at a constant  
15 rate until the log raft system failed, the largest examples (G1-G2) could have survived for up to two  
16 years (SI Table 3). Preserved fossil examples in this study were close to their maximum point viability  
17 as a mobile substrate. This point is evident from smaller logs (S1-S2) whose population was simply too  
18 big to be supported by the smaller log structure. However, the model looks at the viability of the climax  
19 community that would take time to develop, and would expand the life of the colony within the  
20 parameters of the model >2 years. However, modern growth rates for recent isocrinid crinoids 30-40  
21 cm<sup>21</sup> in length suggests it would have taken at least 10 years for *Seirocrinus* to reach maturity. Although  
22 the growth rates of this crinoid may have been faster due to the unusual structure of the stem<sup>22</sup>. For  
23 these communities to exist to maturity the log needs to float for much longer than 2 years (Fig. 2). Our  
24 oyster community growth model in contrast, predicts that the megaraft was viable for up to and



1 exceeding 20 years (SI Data). This length of time would require the structure to be sealed by an oyster  
2 coating to preserve any failures in the wood structure. The key to understanding how this lifespan of the  
3 megaraft was possible, is firstly by identifying areas of weaknesses were the structure is most likely to  
4 fail, this would include areas on the surface not coated in bark and secondly the ends of the log system  
5 that expose the wood xylem<sup>23</sup>. However, it is clear from all the examples examined that most of the  
6 surface is covered in oysters (Fig. 1) and as our results suggest that the crinoids themselves are  
7 preferentially distributed at one terminal end of the system (Fig. 3), contributing to the natural sealing of  
8 that end of the log system. Not all areas of the log were sealed and this would have shortened the  
9 lifespan of the community.

10 Thirdly, the viability of the community would have been influenced by the natural properties of the  
11 wood itself. Although it is hard to model the wood structure with no fossil remains available in the  
12 Posidonia Shale<sup>24</sup>, the gymnosperm wood structure with the addition of the oyster coating and other  
13 agents such as aquatic fungus and algal slime must have allowed for sealing of the log and increased its  
14 longevity substantially beyond our models of continuous infiltration<sup>25</sup>. Estimates vary for how long  
15 modern gymnosperm pine driftwood can survive (see SI for full discussion). Some estimates are as little  
16 as 17 months<sup>26</sup> while others suggest that the wood could have remained buoyant up to 5 years after  
17 entering the marine environment (see SI Data). The exceptional properties of the Jurassic gymnosperm  
18 wood with natural sealing by the oysters and crinoids, and without modern aggressive wood boring  
19 predators, which evolved later in the Mesozoic<sup>27</sup> the wood would have likely floated for longer than the  
20 5 years observed in today's driftwood. The colony could therefore have survived for the 10 years  
21 needed for a community to reach maturity, and possibly longer, until the decay and water infiltration of  
22 the wood reached a limit that could no longer support any further community growth. At which point  
23 the log sank and the crinoids died, being perfectly preserved by the anoxic conditions on the seabed<sup>11</sup>.  
24 Evidence suggests that fragments might have broken off while the system was in a state of decay which

1 might explain the occurrence of single mature individuals attached to relatively small fragments of  
2 wood observed across the museum collections examined.

3 Pseudoplanktonic organisms are highly significant for global ecology and biodiversity, as a  
4 mechanism for global colonisation<sup>28</sup>, typically attaching themselves to nektonic and planktonic organisms  
5 or other floating objects such as driftwood or flotsam. These are significant in today's ecosystems and  
6 were responsible for the colonisation of oceanic islands such as Hawaii<sup>29</sup>. These temporary rafts can  
7 become a permanent home to self-contained long-term communities such as, in modern ecosystems,  
8 external goose barnacles, tunicates and bryozoans<sup>30</sup>, with wood boring bivalves such as shipworms  
9 inhabiting the internal structures<sup>31</sup>.

10 Our analysis suggests that the exceptionally preserved Jurassic crinoid megarrafts are the longest  
11 surviving communities to exist in the fossil record. Our results not only demonstrate that they have an  
12 ecological structure consistent with a recent living megarraft colony<sup>32,33</sup> (See SI Data) but with efficient  
13 sealing these communities could have survived for up to and exceeding 20 years. In contrast, those  
14 recorded today have survived for up to 6 years. These extant megarrafts of marine debris deliver  
15 substantial communities of adult organisms capable of reproduction or colonization by zooplankton in  
16 marginal marine environments from one continental margin to another<sup>5</sup>. Rafts tend to be one-way  
17 arrival and deposition events which limit their journey time and life span before they encounter another  
18 system. These colonies are slow moving (1 to 2 knots) compared with modern commercial vessels (20  
19 to >25 knots). These data are consistent with palaeoenvironmental interpretations suggesting an  
20 inhospitable seabed<sup>34</sup>, indicating that these colonies remained afloat to survive and developed largely in  
21 isolation and could easily have spread around the globe. Our data suggests that the life of the colony  
22 was far more dependent on the wood structure than previously thought. Although the total weight of the  
23 crinoids would finally contribute to sinking of the system, they are comparatively lightweight organisms  
24 compared to the oysters.

## 1 **Conclusions**

2 We have demonstrated that Jurassic crinoids did inhabit this unique pseudoplanktonic niche,  
3 becoming highly adapted, fast growing, very lightweight and self-sufficient viable communities. In the  
4 early Mesozoic seas, these rafts were home to far larger and more complex, now lost, ecosystems whose  
5 existence was a necessity as a result of a high number of anoxic shallow water basins<sup>34,35</sup>. Development  
6 of this lifestyle ensured the continued success of the group. The appearance of wood boring bivalves,  
7 and the prevalence of angiosperm wood along with the restoration of healthy benthic environments by  
8 the Middle Jurassic<sup>9,13</sup> meant that this unique ecological phenomenon vanished from the fossil record  
9 forever.

10

## 11 **Materials and Methods**

12 *Data collection* Photographs were taken from six specimens and composite images produced. These  
13 include small, medium and finally massive giant colonies from the following German museums and  
14 collections: Geoscience Centre of the University of Göttingen; Werkforum Museum, Dotternhausen;  
15 Naturmuseum Senckenberg in Frankfurt am Main; Geological Institute, University of Tuebingen;  
16 Staatliches Museum für Naturkunde, Stuttgart; and Urweltmuseum Hauff, Holzmaden.

17

18 *Spatial analysis* Randomly distributed points can be modelled using homogeneous Poisson processes,  
19 and are found, for example, when larvae attach to an substrate not impacted by strong currents nor  
20 patchy environmental variables<sup>36</sup>. While spatial processes that depend on position on the substrate can  
21 be modelled using heterogeneous Poisson processes, with density changing according to a given  
22 formula. To assess how disc density changed along the log, disc density was modelled as a  
23 heterogeneous Poisson process dependent on the  $x$  co-ordinate and then the  $y$ -co-ordinate. Model fit was  
24 assessed using the model residuals by plotting Q–Q and smoothed residual plots. If the observed line in

1 the Q–Q plot fell outside two standard deviations of the model, the model was rejected<sup>16,37</sup>. Akaike  
2 information criterion values<sup>38</sup> were used to compare the relative quality of the statistical models that  
3 fitted the data.

4  
5 *Diffusion analyses* As it is not possible to know the actual properties of the fossil wood or the actual  
6 growth rate of the oysters, two types of models were developed. The first is a set of ‘catastrophic’  
7 models which look at how long a series of size defined structures can survive with no natural sealing.  
8 The second model is predictive, and proposes how long the mega-raft could have lasted if the system  
9 was efficiently sealed. For the first model, three sets of size defined colonies (Fig. 2), including small  
10 colony specimens (S1 & S2) medium colonies (M1 & M2) and finally massive giant colonies from  
11 Holzmaden (G1 “The Hauff Specimen” & G2) were tested. To address the stability of the log and  
12 colony, the density/diffusion model is constructed for each of the colony three-size classes using the log  
13 properties without any maximum growth population attached, then the crinoid community is added,  
14 along with a layer of oysters<sup>11</sup>. The models use a colony weight based on modern isocrinid *Metacrinus*  
15 and Japanese oysters (*Crassostrea gigas*). They assume there is no natural sealing of the wood and it  
16 begins to absorb water, and therefore breakdown, from the onset of the colony.

17  
18 **Data Availability:** Extended Methods for the Spatial analysis and the Diffusion analysis as well as  
19 properties, definitions and equations are discussed in detail in SI data.

20  
21 **Acknowledgements:** We thank the following institutions for access to the specimens: Geoscience  
22 Centre of the University of Göttingen; Werkforum Museum, Dotternhausen; Naturmuseum Senckenberg,  
23 Frankfurt am Main; Geological Institute, University of Tuebingen; Staatliches Museum für Naturkunde,  
24 Stuttgart; and Urweltmuseum Hauff, Holzmaden.

## 1 **References**

- 2 1. Briggs JC (1974) Operation of zoogeographic barriers. *Systematic Biology* 23(2):248-256.
- 3 2. Thiel M & Gutow L (2005) The ecology of rafting in the marine environment. I. The floating  
4 substrata. *Oceanography and Marine Biology: An Annual Review* 42:181-264.
- 5 3. Thiel M & Haye P (2006) The ecology of rafting in the marine environment. Iii. Biogeographical  
6 and evolutionary consequences. *Oceanography and Marine Biology: An Annual Review*  
7 48:323-429.
- 8 4. Thiel M & Fraser C (2016) The role of floating plants in dispersal of biota across habitats and  
9 ecosystems. *Marine Macrophytes as Foundation Species*, ed Olafsson E (CRC Press, Taylor &  
10 Francis Group, Boca Raton, Florida), pp 76-94.
- 11 5. Carlton JT, *et al.* (2017) Tsunami-driven rafting: Transoceanic species dispersal and implications  
12 for marine biogeography. *Science* 357(6358):1402-1406.
- 13 6. Hagdorn H (2016) From benthic to pseudoplanktonic life: morphological remodeling of the Triassic  
14 crinoid *Traumatocrinus* and the Jurassic *Seirocrinus* during habitat change. *PalZ* 90(2):225-241.
- 15 7. Seilacher A (2011) Developmental transformations in Jurassic driftwood crinoids. *Swiss Journal of*  
16 *Palaeontology* 130(1):129-141.
- 17 8. Matzke AT & Maisch MW (2019) Palaeoecology and taphonomy of a *Seirocrinus* (Echinodermata:  
18 Crinoidea) colony from the Early Jurassic Posidonienschiefer Formation (Early Toarcian) of  
19 Dotternhausen (SW Germany). *Neues Jahrbuch für Geologie und Paläontologie-Abhandlungen*  
20 291(1):89-107.
- 21 9. Hunter AW & Underwood CJ (2009) Palaeoenvironmental control on distribution of crinoids in the  
22 Bathonian (Middle Jurassic) of England and France. *Acta Palaeontologica Polonica* 54(1):77-98.

- 1 10. Hess H (2010) Part T, Revised, Volume 1, Chapter 19: Paleoecology of pelagic crinoids.  
2 *Treatise-online, Number 16*, ed Ausich WI (The University of Kansas Paleontological Institute,  
3 Lawrence, Kansas), pp 1-33.
- 4 11. Seilacher A, Drozdowski G, & Haude R (1968) Form and function of the stem in a  
5 pseudoplanktonic crinoid (*Seirocrinus*). *Palaeontology* 11(2):275-282.
- 6 12. Rasmussen HW (1977) Function and attachment of the stem in Isocrinidae and Pentacrinidae:  
7 review and interpretation. *Lethaia* 10(1):51-57.
- 8 13. Hess H (1999) Chapter 23. Lower Jurassic Posidonia Shale of Southern Germany. *Fossil Crinoids*,  
9 eds Hess H, Ausich WI, Brett CE, & Simms MJ (Cambridge University Press, Cambridge, UK;  
10 New York, NY, USA), pp 183-196.
- 11 14. Nakano H, Hibino T, Oji T, Hara Y, & Amemiya S (2003) Larval stages of a living sea lily (stalked  
12 crinoid echinoderm). *Nature* 421(6919):158-160.
- 13 15. Simms MJ (1986) Contrasting lifestyles in Lower Jurassic crinoids: a comparison of benthic and  
14 pseudopelagic Isocrinida. *Palaeontology* 29(3):475-493.
- 15 16. Illian J, Penttinen A, Stoyan H, & Stoyan D (2008) *Statistical Analysis and Modelling of Spatial*  
16 *Point Patterns* (John Wiley & Sons, Chichester) p 560.
- 17 17. Mitchell EG, Kenchington CG, Liu AG, Matthews JJ, & Butterfield NJ (2015) Reconstructing the  
18 reproductive mode of an Ediacaran macro-organism. *Nature* 524(7565):343-346.
- 19 18. Jacobson AJ & Banerjee S (2006) Diffusion of tritiated water into water-saturated wood particles.  
20 *Holzforschung* 60(1):59-63.
- 21 19. Wood J & Gladden LF (2002) Modelling diffusion and reaction accompanied by capillary  
22 condensation using three-dimensional pore networks. Part 1. Fickian diffusion and  
23 pseudo-first-order reaction kinetics. *Chemical Engineering Science* 57(15):3033-3045.

- 1 20. Ashton G, Davidson I, & Ruiz G (2014) Transient small boats as a long-distance coastal vector for  
2 dispersal of biofouling organisms. *Estuaries and Coasts* 37(6):1572-1581.
- 3 21. Messing CG, David J, Roux M, Améziane N, & Baumiller TK (2007) *In situ* stalk growth rates in  
4 tropical western Atlantic sea lilies (Echinodermata: Crinoidea). *Journal of Experimental Marine*  
5 *Biology and Ecology* 353(2):211-220.
- 6 22. Haude R (1980) Constructional morphology of the stems of Pentacrinitidae, and mode of life of  
7 *Seirocrinus*. *Echinoderms: Present and Past. Proceedings of the European Colloquium on*  
8 *Echinoderms, Brussels*, ed Jangoux M (A A Balkema, Rotterdam), pp 17-23.
- 9 23. Harmon ME, *et al.* (2004) Ecology of coarse woody debris in temperate ecosystems. *Advances in*  
10 *Ecological Research* 34:59-234.
- 11 24. Fengel D (1991) Aging and fossilization of wood and its components. *Wood Science and*  
12 *Technology* 25(3):153-177.
- 13 25. Fritz WJ & Harrison S (1985) Transported trees from the 1982 Mount St. Helens sediment flows:  
14 their use as paleocurrent indicators. *Sedimentary Geology* 42(1-2):49-64.
- 15 26. Häggblom A (1982) Driftwood in Svalbard as an indicator of sea ice conditions: a preliminary  
16 report. *Geografiska Annaler: Series A, Physical Geography* 64(1-2):81-94.
- 17 27. Kelly SRA (1988) *Turnus? davidsoni* (de Loriol), the earliest British pholadid wood-boring bivalve,  
18 from the Late Jurassic of Oxfordshire. *Proceedings of the Geologists' Association* 99(1):43-47.
- 19 28. Wignall PB & Simms MJ (1990) Pseudoplankton. *Palaeontology* 33(2):359-378.
- 20 29. Barnes DKA & Fraser KPP (2003) Rafting by five phyla on man-made flotsam in the Southern  
21 Ocean. *Marine Ecology Progress Series* 262:289-291.
- 22 30. Donlan CJ & Nelson PA (2003) Observations of invertebrate colonized flotsam in the eastern  
23 tropical Pacific, with a discussion of rafting. *Bulletin of Marine Science* 72(1):231-240.

- 1 31. Schiffer PH & Herbig H-G (2016) Endorsing Darwin: global biogeography of the epipelagic goose  
2 barnacles *Lepas* spp. (*Cirripedia*, *Lepadomorpha*) proves cryptic speciation. *Zoological Journal of*  
3 *the Linnean Society* 177(3):507-525.
- 4 32. Tsunoda K (1979) Ecological studies of shipworm attack on wood in the sea water log storage site.  
5 *Bulletin of the Wood Research Institute Kyoto University* 65:11-53.
- 6 33. Tsunoda K & Nishimoto K (1978) Studies on the Shipworms III: Pattern of Vertical Settlement of  
7 Shipworms. *Bulletin of the Wood Research Institute Kyoto University* 64:1-8.
- 8 34. Röhl H-J, Schmid-Röhl A, Oschmann W, Frimmel A, & Schwark L (2001) The Posidonia Shale  
9 (Lower Toarcian) of SW-Germany: an oxygen-depleted ecosystem controlled by sea level and  
10 palaeoclimate. *Palaeogeography, Palaeoclimatology, Palaeoecology* 165(1-2):27-52.
- 11 35. Pittet B, Suan G, Lenoir F, Duarte LV, & Mattioli E (2014) Carbon isotope evidence for  
12 sedimentary discontinuities in the lower Toarcian of the Lusitanian Basin (Portugal): Sea level  
13 change at the onset of the Oceanic Anoxic Event. *Sedimentary Geology* 303:1-14.
- 14 36. Edwards KF & Stachowicz JJ (2011) Spatially stochastic settlement and the coexistence of benthic  
15 marine animals. *Ecology* 92(5):1094-1103.
- 16 37. Wiegand T, Gunatilleke S, & Gunatilleke N (2007) Species associations in a heterogeneous Sri  
17 Lankan dipterocarp forest. *The American Naturalist* 170(4):E77-E95.
- 18 38. Baddeley A, Rubak E, & Møller J (2011) Score, pseudo-score and residual diagnostics for spatial  
19 point process models. *Statistical Science* 26(4):613-646.
